# Supplementary material for: Label-Free Study of the Global Cell Behavior during Exposure to Environmental Radiofrequency Fields in the Presence or Absence of Pro-Apoptotic or Pro-Autophagic Treatments
Source: MDPI journal article supplement (doi:10.3390/ijms23020658), 2022-01-08
Supplement: s1 [file s1]

**Supplementary Table S1:** Number of replicate per experimental condition performed using the XCell-RF setup.

|                          | S.A.R.<br>(W/kg) : | Mock condition |    |     |      |    | As <sub>2</sub> O <sub>3</sub> |   |     |      |    |
|--------------------------|--------------------|----------------|----|-----|------|----|--------------------------------|---|-----|------|----|
|                          |                    | sham           | 5  | 7.6 | 11.3 | 24 | sham                           | 5 | 7.6 | 11.3 | 24 |
| Astrocytes               | CW                 | 40             | 11 | 11  | 7    | 11 | 32                             | 9 | 9   | 9    | 9  |
|                          | GSM                | 32             | 8  | 8   | 8    | 8  | 32                             | 8 | 8   | 8    | 8  |
|                          | Wi-Fi              | 32             | 8  | 8   | 6    | 8  | 32                             | 8 | 8   | 8    | 8  |
| neurone /<br>glial cells | CW                 | 24             | 6  | 6   | 6    | 5  | 24                             | 6 | 6   | 6    | 6  |
|                          | GSM                | 24             | 6  | 6   | 6    | 6  | 24                             | 6 | 6   | 6    | 6  |
| SH-SY5Y                  | CW                 | 4              | 4  | 4   | 4    | 4  | 7                              | 4 | 4   | 4    | 4  |
|                          | GSM                | 12             | 6  | 6   | 6    | 6  | 12                             | 6 | 6   | 6    | 6  |
|                          | Wi-Fi              | 20             | 9  | 8   | 7    | 7  | 12                             | 8 | 8   | 8    | 8  |
|                          | LTE                | 16             | 8  | 8   | 8    | 8  | 16                             | 8 | 8   | 8    | 8  |
|                          | UMTS               | 12             | 6  | 6   | 6    | 6  | 12                             | 6 | 6   | 6    | 6  |
